# Supplementary material for: In situ assembled titanium carbide-based heterojunctions for the synergistic enhancement of NIR-II photothermal/photodynamic therapy against breast cancer
Source: Royal Society of Chemistry journal article supplement (doi:10.1039/d2tb01783k), 2022-01-01
Supplement: d2tb01783k1.pdf [file d2tb01783k1.pdf]

## *Supporting Information*

### ***In-situ* assembled titanium carbide-based heterojunctions for synergistic enhancement of NIR-II photothermal/photodynamic therapy against breast cancer**

Hai Zhu, Xuequan Zhang, Qiusheng Wang, Jing Li, Jin Deng, Zhuangzhuang Zhang, Xiaoxian Zhang, Jun Cao\*, Bin He\*

\*Corresponding authors:

Prof. Jun Cao, Bin He

National Engineering Research Center for Biomaterials, College of Biomedical Engineering, Sichuan University, Chengdu 610064, China

Tel: +86-28-85412848; E-mail: [caojun@scu.edu.cn](mailto:caojun@scu.edu.cn) (J. C), [bhe@scu.edu.cn](mailto:bhe@scu.edu.cn) (B.H)

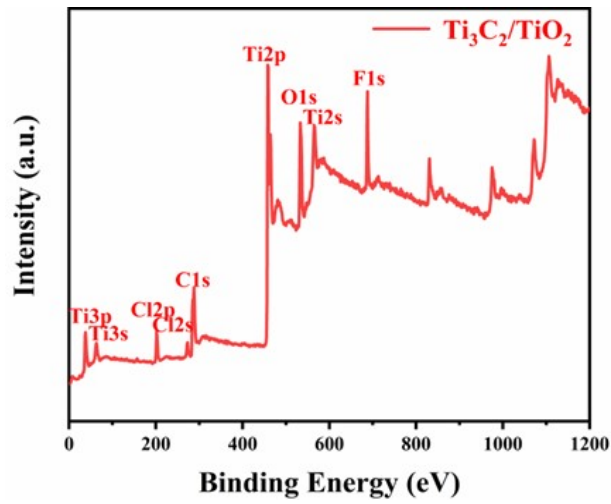

Fig. S1. XPS spectrum  $\text{Ti}_3\text{C}_2/\text{TiO}_2$  in Ti 2p region.

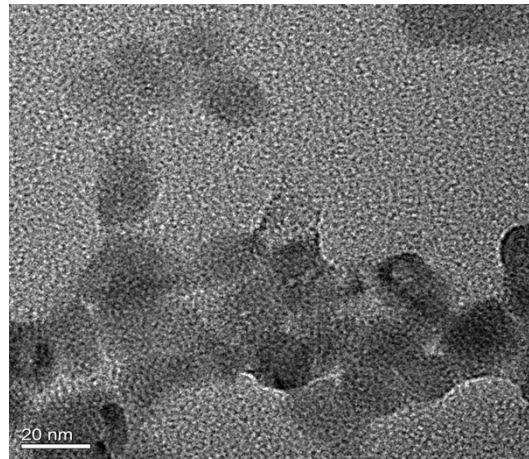

Fig. S2. The morphology of  $\text{TiO}_2$  nanoparticles.

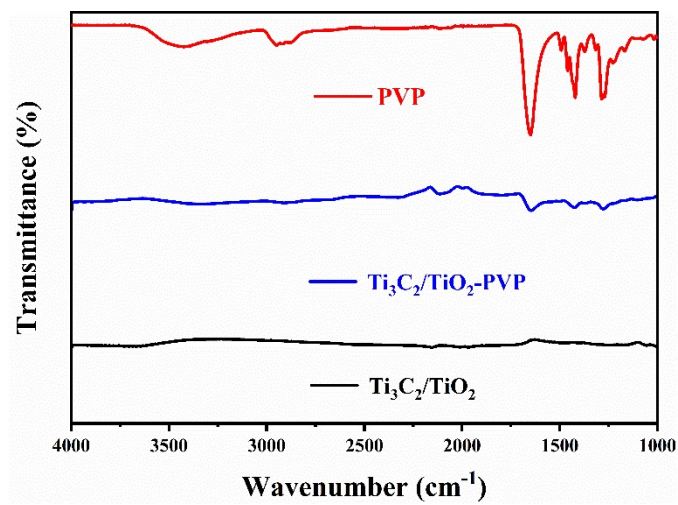

Fig. S3. FTIR spectra PVP,  $\text{Ti}_3\text{C}_2/\text{TiO}_2$  and  $\text{Ti}_3\text{C}_2/\text{TiO}_2$ -PVP HJs.

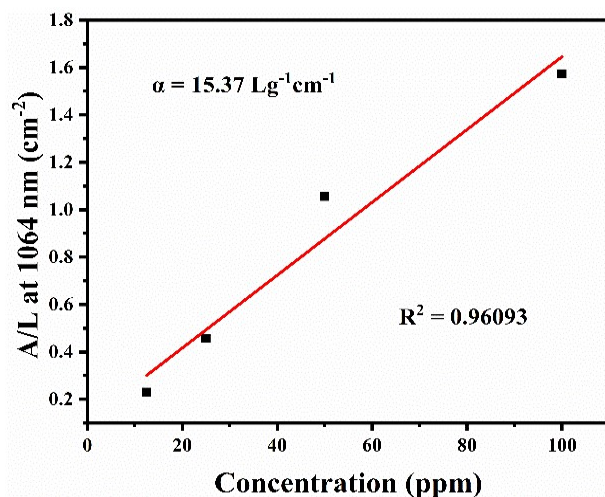

**Fig. S4.** Mass extinction coefficient of  $\text{Ti}_3\text{C}_2/\text{TiO}_2$ -PVP HJs at 1064 nm.

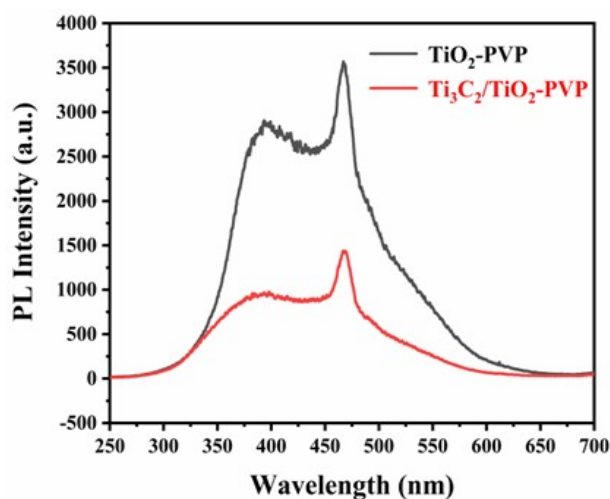

**Fig. S5.** Fluorescence spectra of  $\text{TiO}_2$ -PVP and  $\text{Ti}_3\text{C}_2/\text{TiO}_2$ -PVP HJs with the same titanium concentration.

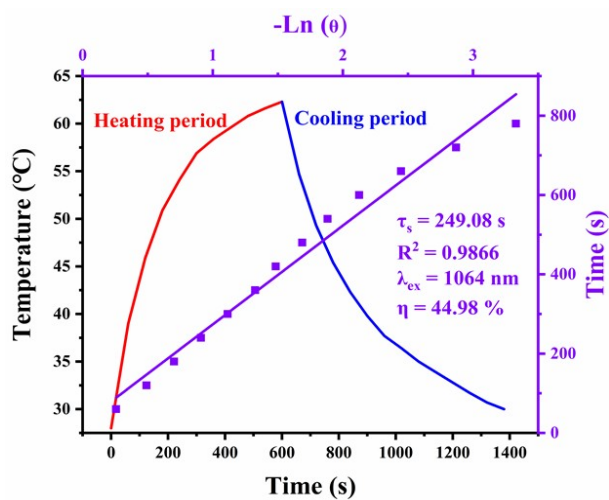

**Fig. S6.** Calculation of the photothermal-conversion efficiency at 1064 nm (NIR-II). Orange and blue line: photothermal effect of an aqueous dispersion of  $\text{TiO}_2/\text{Ti}_3\text{C}_2$ -PVP

under the irradiation with NIR-II laser for certain periods, and then the laser was switched off. Purple line: time constant ( $\tau_s$ ) for the heat transfer from the system determined by applying the linear time data from the cooling period.

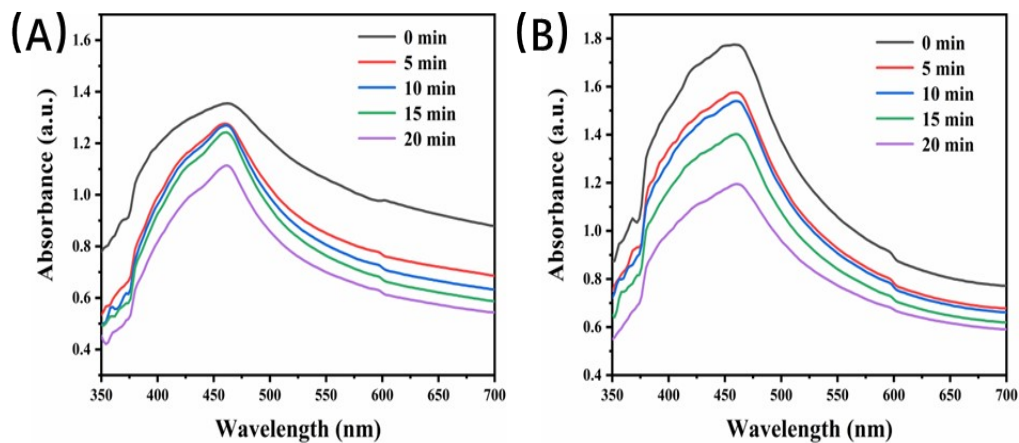

**Fig. S7.** Time-dependent degradation of DPBF caused by  $^1\text{O}_2$  generated by  $\text{TiO}_2$ -PVP (A) and  $\text{Ti}_3\text{C}_2$ -PVP (B), respectively, under laser irradiation (660 nm, 1 W/cm<sup>2</sup>, 10 min).

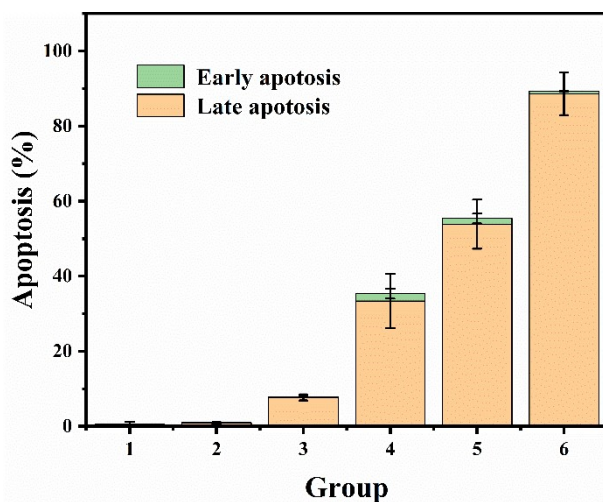

**Fig. S8.** Cell apoptosis of 4T1 cells after incubated with 0 and 200 ppm concentrations of  $\text{Ti}_3\text{C}_2/\text{TiO}_2$ -PVP HJs with 1064 nm irradiation. Note: 1: Control; 2: Only 660 nm; 3: Only 1064 nm; 4:  $\text{Ti}_3\text{C}_2/\text{TiO}_2$ -PVP+660 nm; 5:  $\text{Ti}_3\text{C}_2/\text{TiO}_2$ -PVP+1064 nm; 6:  $\text{Ti}_3\text{C}_2/\text{TiO}_2$ -PVP+660 nm+1064 nm.

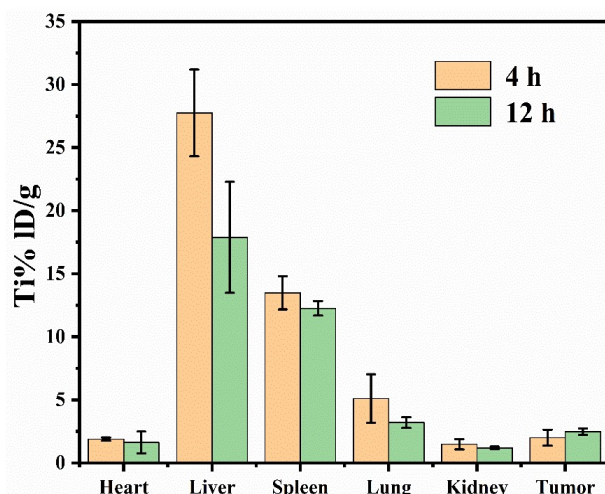

**Fig. S9.** In vivo Ti bio-distributions after injecting  $\text{Ti}_3\text{C}_2/\text{TiO}_2$ -PVP into female tumor-bearing mice for 4 h, 12 h. Data are expressed mean  $\pm$  SD (n = 3).

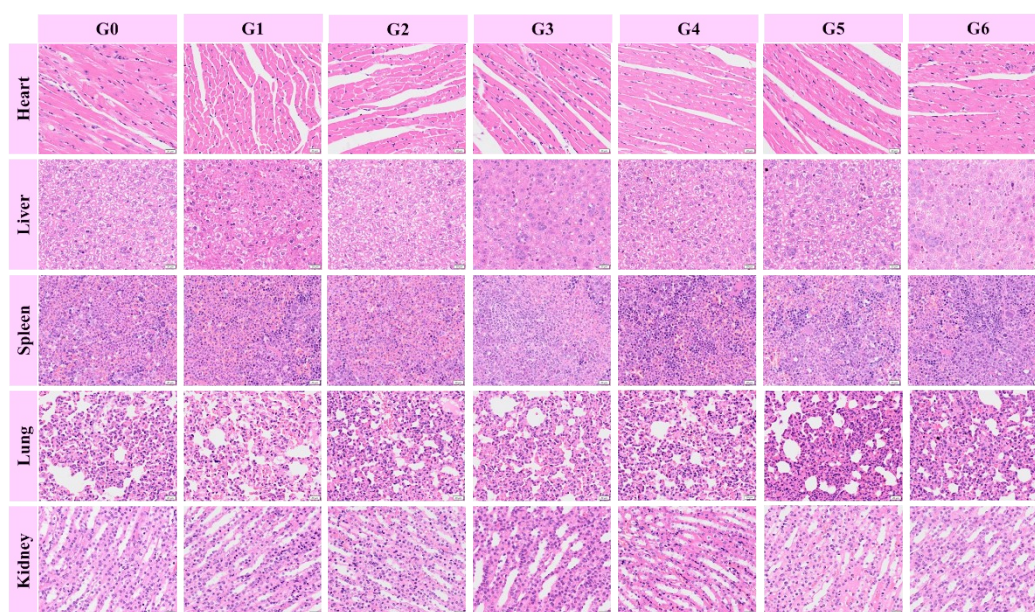

**Fig. S10.** H&E staining of heart, liver, spleen, lung and kidney from different groups (scale bar = 20  $\mu\text{m}$ ). Note: G0: control group (treated only with PBS), G1: 1064 nm laser group (only exposed to 1064 nm laser irradiation), G2: 660 nm laser group (only exposed to 660 nm laser irradiation), G3:  $\text{Ti}_3\text{C}_2/\text{TiO}_2$ -PVP HJs group (only intravenously injected with  $\text{Ti}_3\text{C}_2/\text{TiO}_2$ -PVP HJs), G4:  $\text{Ti}_3\text{C}_2/\text{TiO}_2$ -PVP HJs + 660 nm laser group, G5:  $\text{Ti}_3\text{C}_2/\text{TiO}_2$ -PVP HJs + 1064 nm laser group, and G6:  $\text{Ti}_3\text{C}_2/\text{TiO}_2$ -PVP HJs + 660 and 1064 nm laser group.
